# Supplementary material for: Pharmacological activation of TRPV4 produces immediate cell damage and induction of apoptosis in human melanoma cells and HaCaT keratinocytes
Source: PubMed Central journal article supplement (PMC5749757; doi:10.1371/journal.pone.0190307), 2018-01-02
Supplement: pone.0190307.s001.pdf [file pone.0190307.s001.pdf]

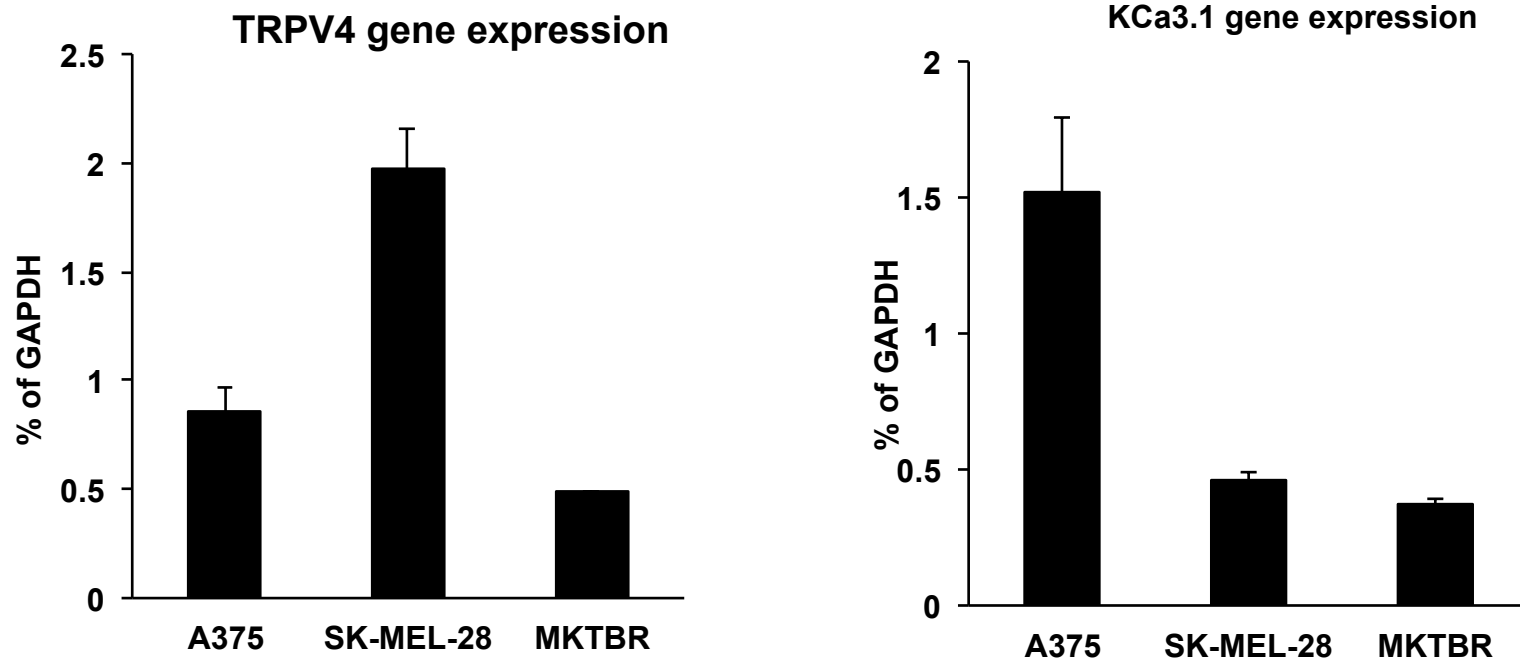

**S1 Fig. TRPV4 and KCa3.1 gene expression.** Comparative quantitative RT-PCR analysis of channel expression as percentage of GAPDH expression in A375, SK-MEL-28, and MKTBR (replicates, n=3). Data points are means  $\pm$  SEM.
