# Supplementary material for: Pharmacological activation of TRPV4 produces immediate cell damage and induction of apoptosis in human melanoma cells and HaCaT keratinocytes
Source: PubMed Central journal article supplement (PMC5749757; doi:10.1371/journal.pone.0190307), 2018-01-02
Supplement: pone.0190307.s002.pdf [file pone.0190307.s002.pdf]

**MKTBR**

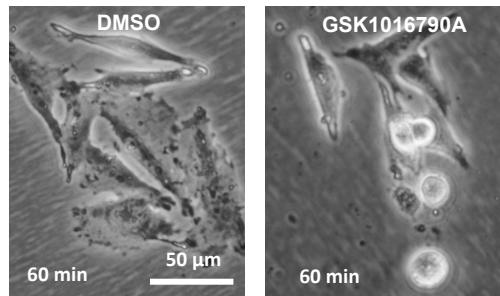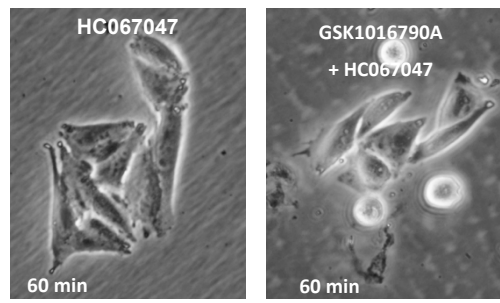

**HaCaT**

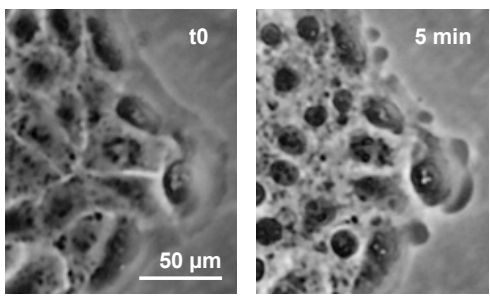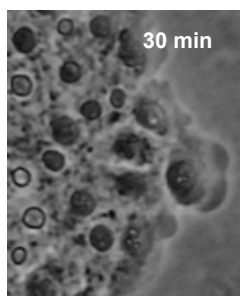

**HaCaT**

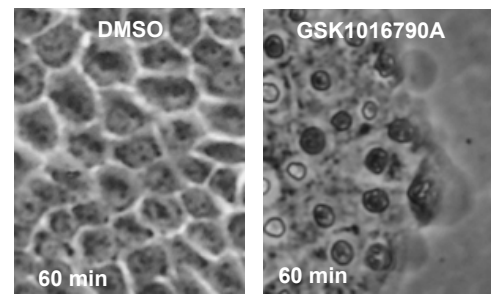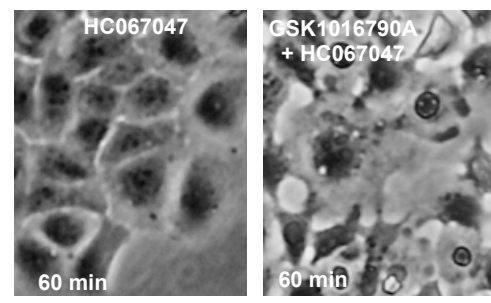

**HaCaT**

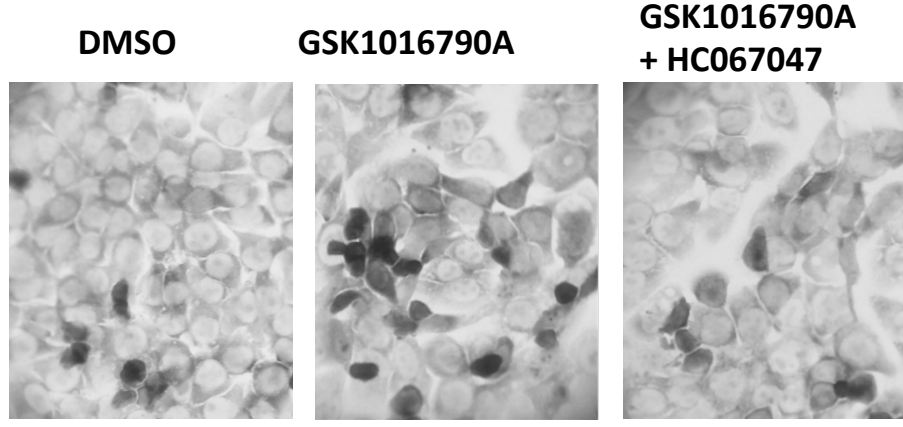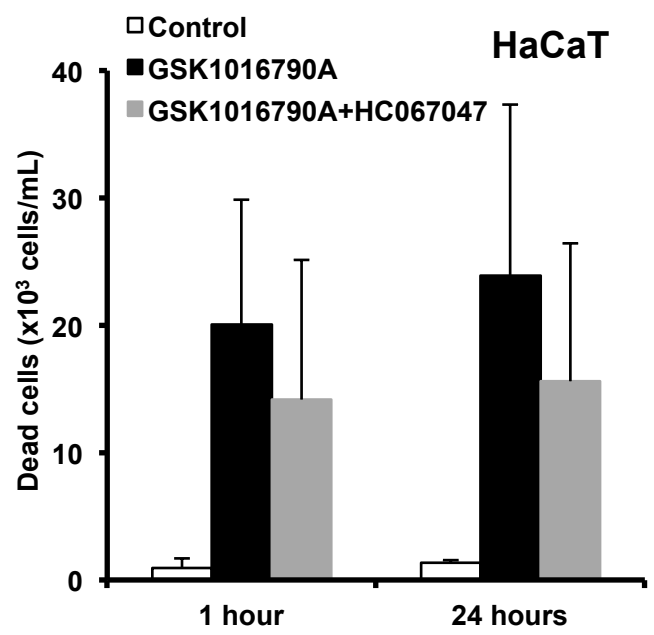

**S2 Fig. Cell morphology.** A) Exemplary light microscopic images of GSK1016790A-induced morphological alterations in MKTBR melanoma cells after 1 h and protective effect of HC067047. B) Time course of morphological alterations of HaCaT keratinocytes during the first hour of exposure to GSK1016790A (1  $\mu$ M). HC067047 (1  $\mu$ M) prevented GSK1016790A-induced alterations. HC067047 or vehicle (DMSO) had no apparent effect. Lower left panels: Giemsa-stained HaCaT cells after 1 h exposure to GSK1016790A, in combination with HC067047, or DMSO. On right: Counts of non-viable, “death” cells in supernatant. Data points are means  $\pm$  SEM (number of independent experiments, n=3).
