# Supplementary material for: Pharmacological activation of TRPV4 produces immediate cell damage and induction of apoptosis in human melanoma cells and HaCaT keratinocytes
Source: PubMed Central journal article supplement (PMC5749757; doi:10.1371/journal.pone.0190307), 2018-01-02
Supplement: pone.0190307.s003.pdf [file pone.0190307.s003.pdf]

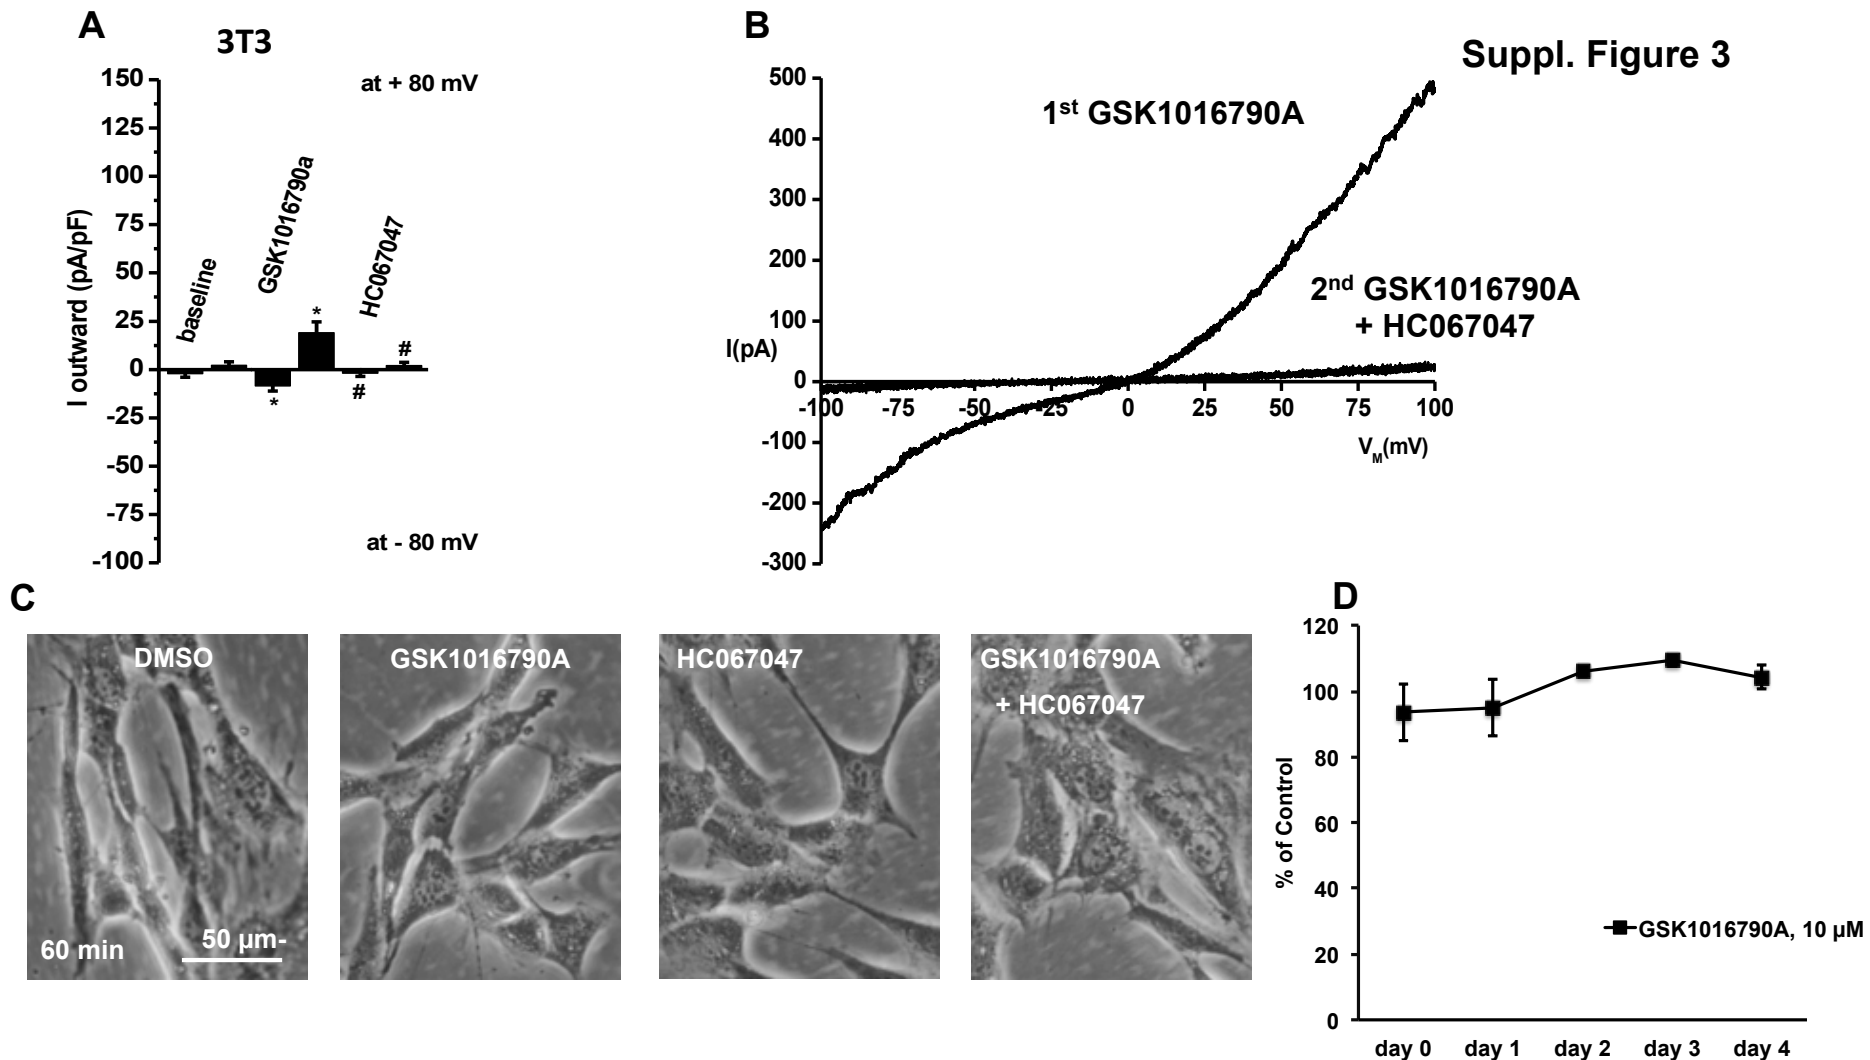

**S3 Fig. Electrophysiological properties of TRPV4 in murine 3T3 fibroblasts.** A) Mean TRPV4-currents activated by GSK1016790A (200 nM) and inhibition by HC067047. Note that current amplitudes were smaller than in melanoma cell lines and HaCaT cells. Data points are means  $\pm$  SEM (n=5). B) Exemplary whole-cell recording (1  $\mu$ M). C) Light microscopic images of 3T3 fibroblast treated with DMSO (vehicle), GSK1016790A (1  $\mu$ M) alone or in combination with HC067047 (1  $\mu$ M), and with HC067047. Note that cells remained morphologically intact. D) GSK1016790A at 10  $\mu$ M did not modulate cell proliferation/survival (n=4).
