# Supplementary material for: Pharmacological activation of TRPV4 produces immediate cell damage and induction of apoptosis in human melanoma cells and HaCaT keratinocytes
Source: PLoS One. 2018 Jan 2;13(1):e0190307. doi: 10.1371/journal.pone.0190307 (PMC5749757; doi:10.1371/journal.pone.0190307)
Supplement: S8 Appendix — (XLS) [file pone.0190307.s011.xls]

## Sheet: Apoptotic cells (%)
			Experiment 1	Experiment 2	Experiment 3	Average	St Dev	SEM
A375	1h	Control	16.49	5.88	6.87	9.74667	5.86084	3.38376
		GSK	46.94	42.05	48.05	45.68	3.19229	1.84307
		GSK+HC	38.61	24.66	29.37	30.88	7.09653	4.09718
	24h	Control	18.86	3.02	12.22	11.3667	7.9544	4.59248
		GSK	39.28	25.74	44.53	36.5167	9.695	5.59741
		GSK+HC	35.35	15.12	29.88	26.7833	10.4645	6.04167
	72h	Control	17.03	5.13	7.57	9.91	6.28563	3.62901
		GSK	25.85	13.17	24.17	21.0633	6.88724	3.97635
		GSK+HC	27.65	9.76	19.96	19.1233	8.9743	5.18131
HaCaT	1h	Control	10.79	5.68	12.75	9.74	3.65008	2.10738
		GSK	71.81	76	78.71	75.5067	3.47635	2.00707
		GSK+HC	56.29	46.89	65.36	56.18	9.23549	5.33211
	24h	Control	11.46	5.76	11.66	9.62667	3.35012	1.9342
		GSK	66.33	78.35	89.86	78.18	11.7659	6.79306
		GSK+HC	48.2	35.25	79.59	54.3467	22.8001	13.1636
	72h	Control	7.02	8.41	17.2	10.8767	5.52009	3.18703
		GSK	46.74	70.87	77.76	65.1233	16.2889	9.4044
		GSK+HC	38.46	39.25	70.33	49.3467	18.1764	10.4941
